# Supplementary material
Source: PubMed Central journal article supplement (PMC111055)
Supplement: nar_28_6_1322__1.pdf [file nar_28_6_1322__1.pdf]

## SUPPLEMENTARY MATERIAL

**Table S1.** <sup>1</sup>H Chemical Shifts of [d(CGC)r(aaa)d(TTGCG)]<sub>2</sub> at 278 K

| Residue | H6/H8 | H5/H2/M5 | H1'  | H2'  | H2'' | H3'  | H4'  | Imino | Amino (B/U) | C2'-OH |
|---------|-------|----------|------|------|------|------|------|-------|-------------|--------|
| 1C      | 7.52  | 5.74     | 5.61 | 1.87 | 2.32 | 4.62 | 3.99 | -     | 8.09/6.99   | -      |
| 2G      | 7.87  | -        | 5.79 | 2.59 | 2.65 | 4.90 | 4.29 | 12.95 | N/A         | -      |
| 3C      | 7.25  | 5.32     | 5.61 | 2.05 | 2.29 | 4.78 | 4.55 | -     | 8.27/6.42   | -      |
| 4a      | 8.14  | 6.87     | 5.68 | 4.82 | -    | 4.13 | 4.46 | -     | 7.65/6.31   | 6.51   |
| 5a      | 7.99  | 7.20     | 5.80 | 4.42 | -    | 4.51 | 4.18 | -     | 7.50/6.44   | 6.77   |
| 6a      | 7.62  | 7.71     | 5.64 | 4.28 | -    | 4.42 | 4.19 | -     | 7.47/6.81   | 6.89   |
| 7T      | 7.31  | 1.43     | 5.68 | 2.11 | 2.51 | 4.56 | 4.14 | 14.05 | -           | -      |
| 8T      | 7.56  | 1.68     | 6.10 | 2.15 | 2.60 | 4.81 | 4.24 | 13.60 | -           | -      |
| 9T      | 7.32  | 1.82     | 5.88 | 2.11 | 2.43 | 4.87 | 4.13 | 13.19 | -           | -      |
| 10G     | 7.80  | -        | 5.77 | 2.55 | 2.59 | 4.94 | 4.94 | 12.38 | N/A         | -      |
| 11C     | 7.28  | 5.31     | 5.65 | 1.87 | 2.27 | 4.78 | 4.13 | -     | 8.24/6.56   | -      |
| 12G     | 7.87  | -        | 6.06 | 2.29 | 2.54 | 4.61 | 5.12 | N/A   | N/A         | -      |

The chemical shift of hydrogen bonded amino proton (B) is downfield, and non-bonded amino proton (U) is upfield.
